# Supplementary material
Source: PubMed Central journal article supplement (PMC5033693)
Supplement: NIHMS798631-supplement-11011_2016_9860_MOESM1_ESM.pdf [file NIHMS798631-supplement-11011_2016_9860_MOESM1_ESM.pdf]

# QUESTIONNAIRE GIVEN TO PATIENTS

Date \_\_\_\_\_

PROMIS Assessment Center ID \_\_\_\_\_

We are now going to go over your results as compared to the general US population and people in the general population within your age group and gender. We will do this for each of the domains that we asked you questions about. We need to know on a scale of 0 to 10 in which 10 is the most and 0 is the least whether you were surprised by these results compared to the US population and if yes, were these results better or worse than you had expected.

Also at the end of this we will ask you what specific strategies we, as health care providers could start or improve to make you feel better.

## Anger:

Indicate along the scale below whether, or not you were surprised by these results?

0 1 2 3 4 5 6 7 8 9 10  
**Completely Expected** **Complete Surprise**

Indicate along the scale below whether the results seemed “better” or “worse” than you expected

0 1 2 3 4 5 6 7 8 9 10  
**Best Possible** **Worst Possible**

## Anxiety:

Indicate along the scale below whether, or not you were surprised by these results?

0 1 2 3 4 5 6 7 8 9 10  
**Completely Expected** **Complete Surprise**

Indicate along the scale below whether the results seemed “better” or “worse” than you expected

0 1 2 3 4 5 6 7 8 9 10  
**Best Possible** **Worst Possible**

**Depression:**

Indicate along the scale below whether, or not you were surprised by these results?

0 1 2 3 4 5 6 7 8 9 10  
**Completely Expected** **Complete Surprise**

Indicate along the scale below whether the results seemed “better” or “worse” than you expected

0 1 2 3 4 5 6 7 8 9 10  
**Best Possible** **Worst Possible**

**Fatigue:**

Indicate along the scale below whether, or not you were surprised by these results?

0 1 2 3 4 5 6 7 8 9 10  
**Completely Expected** **Complete Surprise**

Indicate along the scale below whether the results seemed “better” or “worse” than you expected

0 1 2 3 4 5 6 7 8 9 10  
**Best Possible** **Worst Possible**

**Pain Behavior: is what pain makes you do in your daily life**

Indicate along the scale below whether, or not you were surprised by these results?

0 1 2 3 4 5 6 7 8 9 10  
**Completely Expected** **Complete Surprise**

Indicate along the scale below whether the results seemed “better” or “worse” than you expected

0 1 2 3 4 5 6 7 8 9 10  
**Best Possible** **Worst Possible**

**Pain Interference: is what pain makes it difficult to do in your daily life**

Indicate along the scale below whether, or not you were surprised by these results?

0 1 2 3 4 5 6 7 8 9 10  
**Completely Expected** **Complete Surprise**

Indicate along the scale below whether the results seemed “better” or “worse” than you expected

0 1 2 3 4 5 6 7 8 9 10  
**Best Possible** **Worst Possible**

**Physical Function:**

Indicate along the scale below whether, or not you were surprised by these results?

0 1 2 3 4 5 6 7 8 9 10  
**Completely Expected** **Complete Surprise**

Indicate along the scale below whether the results seemed “better” or “worse” than you expected

0 1 2 3 4 5 6 7 8 9 10  
**Best Possible** **Worst Possible**

**Social Activity: Your satisfaction with your ability to do leisure interest and your friendly relationships**

Indicate along the scale below whether, or not you were surprised by these results?

0 1 2 3 4 5 6 7 8 9 10  
**Completely Expected** **Complete Surprise**

Indicate along the scale below whether the results seemed “better” or “worse” than you expected

0 1 2 3 4 5 6 7 8 9 10  
**Best Possible** **Worst Possible**

**Social Role: Your satisfaction with your ability to perform work and family duties**

Indicate along the scale below whether, or not you were surprised by these results?

0 1 2 3 4 5 6 7 8 9 10  
**Completely Expected** **Complete Surprise**

Indicate along the scale below whether the results seemed “better” or “worse” than you expected

0 1 2 3 4 5 6 7 8 9 10  
**Best Possible** **Worst Possible**

**Sleep disturbance: actual difficulties with sleeping**

Indicate along the scale below whether, or not you were surprised by these results?

0 1 2 3 4 5 6 7 8 9 10  
**Completely Expected** **Complete Surprise**

Indicate along the scale below whether the results seemed “better” or “worse” than you expected

0 1 2 3 4 5 6 7 8 9 10  
**Best Possible** **Worst Possible**

**Sleep-related impairment: how sleep problems affect your daily life**

Indicate along the scale below whether, or not you were surprised by these results?

0 1 2 3 4 5 6 7 8 9 10  
**Completely Expected** **Complete Surprise**

Indicate along the scale below whether the results seemed “better” or “worse” than you expected

0 1 2 3 4 5 6 7 8 9 10  
**Best Possible** **Worst Possible**

February 18, 2016

62692

## Questionnaire Summary Report

Your age: 56

Your gender: Female

**Computerized Adaptive Tests: Anger, Anxiety/Fear, Depressive Symptoms/Sadness, Fatigue, Pain Behavior, Pain Interference, Physical Function, Satisfaction with Discretionary Social Activities, Satisfaction with Social Roles, Sleep Disturbance, Sleep-Related Impairment**

For every questionnaire, the average score is 50 in the US general population.

---

Your estimated score on the Anger questionnaire is 65. Your estimated score indicates that your level of Anger is higher (worse) than:

- 95 percent of people in the general population
  - 96 percent of people age 55-64
  - 94 percent of females
- 

Your estimated score on the Anxiety questionnaire is 65. Your estimated score indicates that your level of Anxiety/Fear is higher (worse) than:

- 94 percent of people in the general population
  - 95 percent of people age 55-64
  - 92 percent of females
- 

Your estimated score on the Depression questionnaire is 65. Your estimated score indicates that your level of Depressive Symptoms/Sadness is higher (worse) than:

- 93 percent of people in the general population
  - 94 percent of people age 55-64
  - 92 percent of females
- 

Your estimated score on the Fatigue questionnaire is 67. Your estimated score indicates that your level of Fatigue is higher (worse) than:

- 95 percent of people in the general population
  - 95 percent of people age 55-64
  - 94 percent of females
- 

Your estimated score on the Pain Behavior questionnaire is 64. Your estimated score indicates that your level of Pain Behavior is higher (worse) than:

- 94 percent of people in the general population
  - 94 percent of people age 55-64
  - 93 percent of females
-

**Your estimated score on the Pain Interference questionnaire is 68. Your estimated score indicates that your level of Pain Interference is higher (worse) than:**

- 95 percent of people in the general population
  - 94 percent of people age 55-64
  - 95 percent of females
- 

**Your estimated score on the Physical Function questionnaire is 33. Your estimated score indicates that your level of Physical Function is higher (better) than:**

- 6 percent of people in the general population
  - 9 percent of people age 55-64
  - 8 percent of females
- 

**Your estimated score on the Social Activity questionnaire is 35. Your estimated score indicates that your level of Satisfaction with Discretionary Social Activities is higher (better) than:**

- 8 percent of people in the general population
  - 12 percent of people age 55-64
  - 8 percent of females
- 

**Your estimated score on the Social Role questionnaire is 36. Your estimated score indicates that your level of Satisfaction with Social Roles is higher (better) than:**

- 9 percent of people in the general population
  - 14 percent of people age 55-64
  - 10 percent of females
- 

**Your estimated score on the Sleep Disturbance questionnaire is 64. Your estimated score indicates that your level of Sleep Disturbance is higher (worse) than:**

- 91 percent of people in the general population
  - 94 percent of people age 55-64
  - 87 percent of females
- 

**Your estimated score on the Sleep-Related Impairment questionnaire is 76. Your estimated score indicates that your level of Sleep-Related Impairment is higher (worse) than:**

- 99 percent of people in the general population
  - 99 percent of people age 55-64
  - 99 percent of females
-

Your scores for the CATs you completed are shown below.

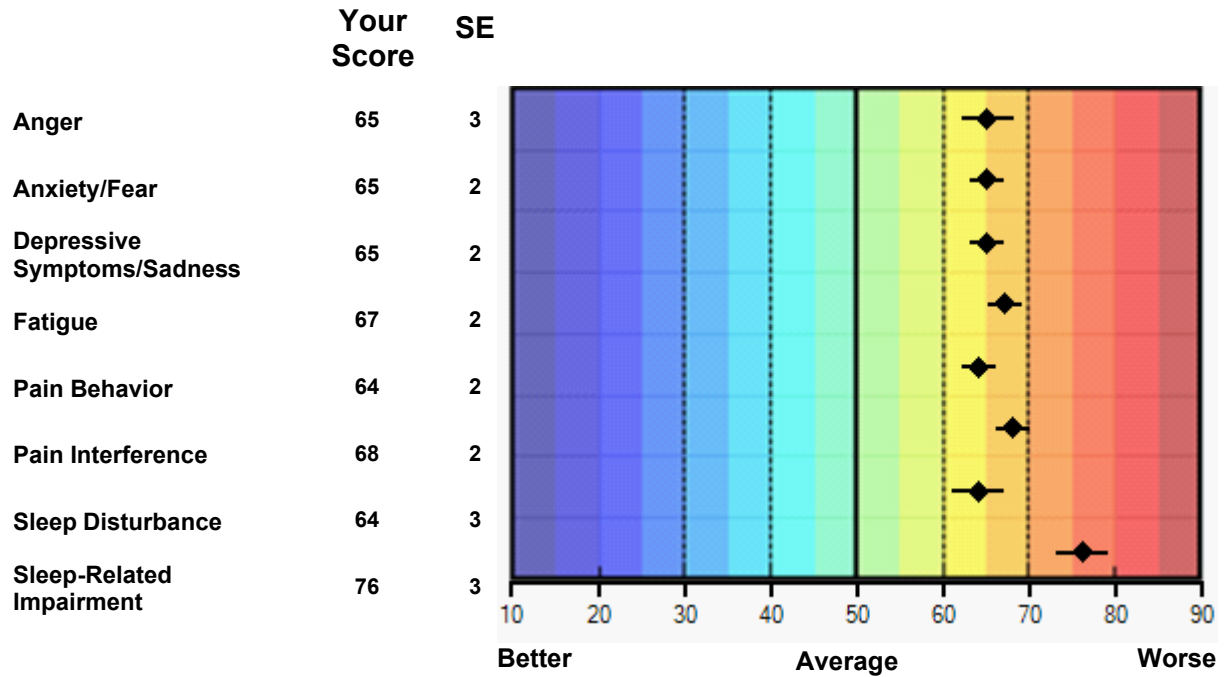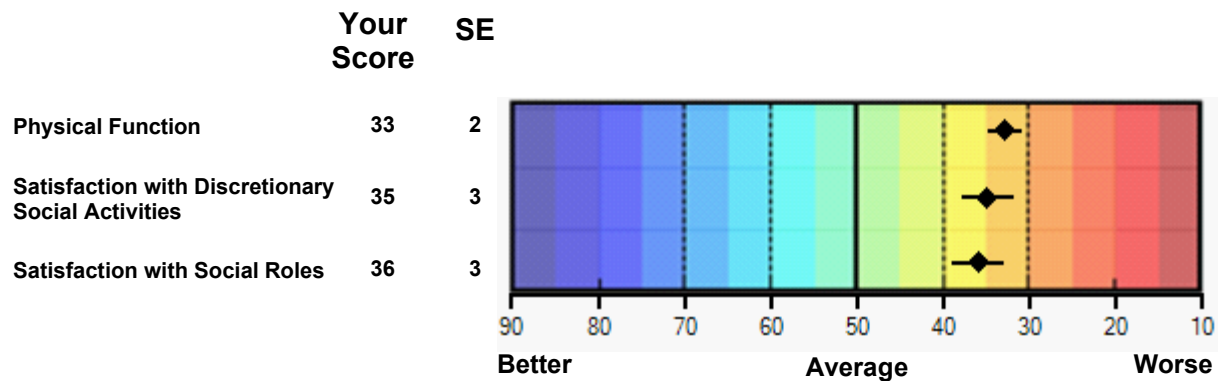

The diamond is your estimated score. For each of the areas above, a score of 50 is average for the United States general population. Most people will score between 40 and 60 and almost all people will score between 30 and 70. The Standard Error (SE) is a statistical measure of variance and represents a “margin of error” around your estimated score. The lines on either side of each diamond reflect the likely range of your actual score.
